# Supplementary material
Source: publisher figshare collection journal article supplement (https://gsajournals.figshare.com/articles/dataset/_/12820517)
Supplement: Supplementary file 3 [file 1]

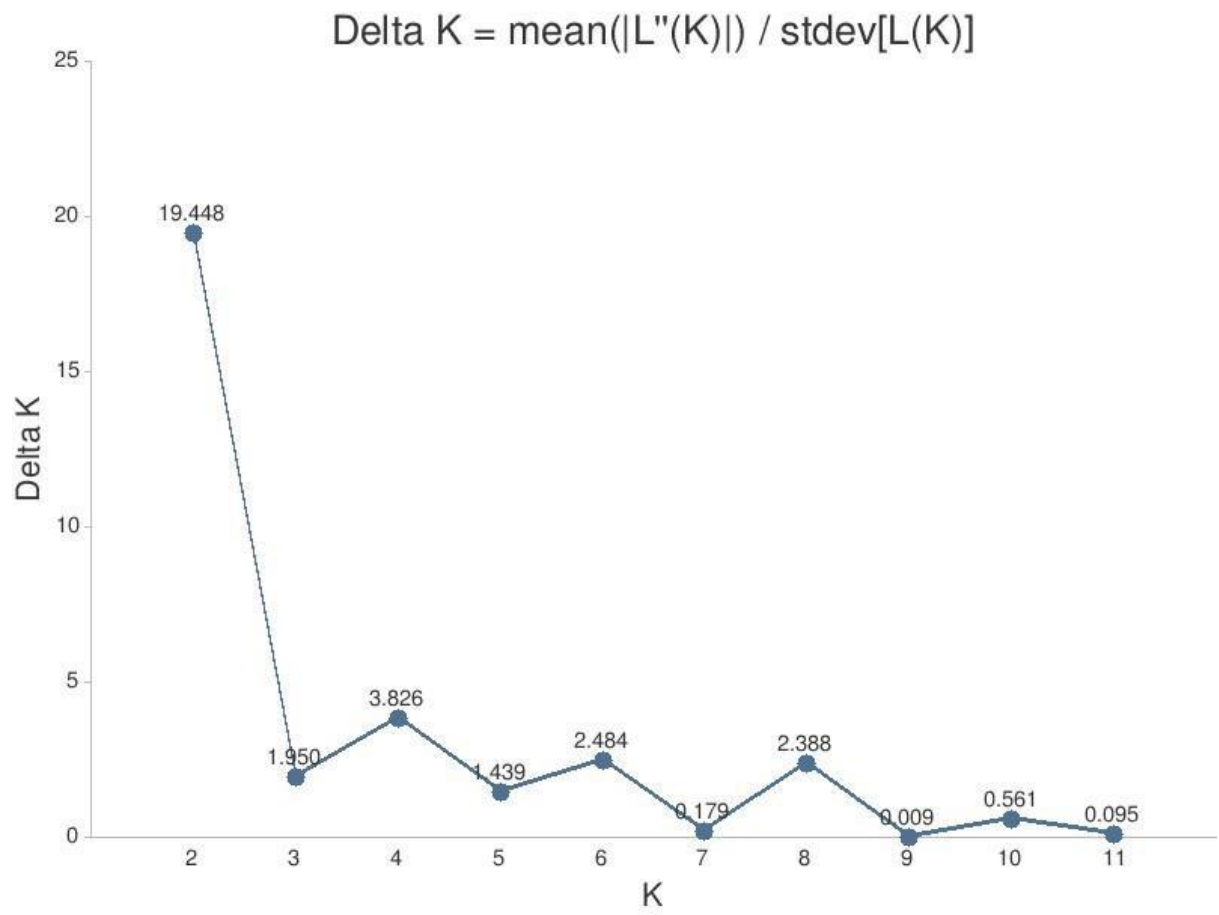

Supplementary Figure 2: Evanno method calculations for the *S. cerevisiae* population in New Zealand.
